# Supplementary material for: Pediatric Subcutaneous Abscess: Still a Clinical Exam-Based Diagnosis and Treatment
Source: MDPI journal article supplement (doi:10.3390/children8050392), 2021-05-14
Supplement: s1 [file s1]

**Supplemental Table 1.** Demographics and patient characteristics of patients without previous oral antibiotic use.

| Variable                            |            | All (n = 200) | Abx (n = 58) | No Abx (n = 142) | p-value |
|-------------------------------------|------------|---------------|--------------|------------------|---------|
| Age (years)                         |            | 4.75 ± 5.4    | 4.36 ± 5.8   | 4.91 ± 5.2       | 0.52    |
| Gender                              | Male       | 88 (44.0%)    | 27 (46.6%)   | 61 (43.0%)       | 0.64    |
| Ethnicity                           | Hispanic   | 84 (42.0%)    | 20 (34.5%)   | 64 (45.1%)       | 0.21    |
| BMI                                 |            | 20.1 ± 10.0   | 20.7 ± 7.5   | 19.7 ± 11.2      | 0.67    |
| Co-morbidities                      |            | 11 (5.5%)     | 1 (1.7%)     | 10 (7.0%)        | 0.18    |
| History of MRSA                     |            | 12 (6.0%)     | 4 (6.9%)     | 8 (5.6%)         | 0.75    |
| History of prior abscess            |            | 60 (30.0%)    | 18 (31.0%)   | 42 (29.6%)       | 0.23    |
| Subjective Fever                    |            | 101 (50.5%)   | 32 (55.2%)   | 69 (48.6%)       | 0.44    |
| Exam Findings                       | Fluctuance | 54 (38.3%)    | 27 (46.6%)   | 54 (38.0%)       | 0.16    |
|                                     | Cellulitis | 110 (55.0%)   | 36 (62.1%)   | 74 (52.1%)       | 0.32    |
|                                     | Both       | 42 (21.0%)    | 14 (24.1%)   | 28 (19.7%)       | 0.57    |
| Temperature (°C)                    |            | 37.2 ± 0.8    | 37.2 ± 0.74  | 37.2 ± 0.81      | 0.58    |
| Heartrate (beats/minute)            |            | 123 ± 26.3    | 125.5 ± 23.6 | 122.0 ± 27.1     | 0.57    |
| Respiratory Rate (breaths/minute)   |            | 25.4 ± 5.3    | 25.7 ± 4.4   | 25.3 ± 5.6       | 0.66    |
| WBC count (10 <sup>9</sup> cells/L) |            | 17.5 ± 6.9    | 18.9 ± 6.8   | 17.0 ± 6.9       | 0.33    |
| CRP level (mg/L)                    |            | 6.4 ± 5.2     | 8.2 ± 6.5    | 5.6 ± 4.2        | 0.21    |
| Area of Abscess (cm <sup>2</sup> )  |            | 24.4 ± 34.9   | 31.5 ± 45.1  | 21.9 ± 30.2      | 0.15    |
| Ultrasound Performed                |            | 108 (54.0%)   | 38 (65.5%)   | 70 (49.3%)       | 0.04    |
| I&D Performed                       |            | 121 (60.5%)   | 34 (58.6%)   | 87 (61.3%)       | 0.75    |
| Wound Culture obtained              |            | 83 (41.5%)    | 28 (48.3%)   | 55 (38.7%)       | 0.27    |
| Blood Culture obtained              |            | 43 (21.5%)    | 11 (19.0%)   | 32 (22.5%)       | 0.71    |
| Packing                             |            | 36 (18.0%)    | 10 (17.2%)   | 26 (18.3%)       | 1.0     |
| Drain placement                     |            | 17 (8.5%)     | 5 (8.6%)     | 12 (8.5%)        | 1.0     |
| IV Antibiotics                      |            | 70 (35.0%)    | 27 (46.6%)   | 43 (30.3%)       | 0.03    |
| Admitted                            |            | 55 (27.5%)    | 20 (34.5%)   | 35 (24.6%)       | 0.17    |
| Recurrence                          |            | 25 (12.5%)    | 8 (13.8%)    | 17 (12.0%)       | 1.0     |

BMI, body mass index; MRSA, methicillin-resistant *Staphylococcus aureus*;  
WBC, white blood cell; CRP, c-reactive protein; I&D, incision and drainage.
